# Supplementary material for: Enzyme Kinetics of the Mitochondrial Deoxyribonucleoside Salvage Pathway Are Not Sufficient to Support Rapid mtDNA Replication
Source: PLOS journal article supplement (doi:10.1371/journal.pcbi.1002078), 2011-08-04
Supplement: S4 (10.1371/journal.pcbi.1002078.s004) [file journal.pcbi.1002078.s004]

# **Supplemental file for “Enzyme Kinetics of the Mitochondrial Deoxyribonucleoside Salvage Pathway Are Not Sufficient to Support Rapid mtDNA Replication”**

Vishal V. Gandhi & David C. Samuels

*Model constants:*

## **Start of L strand replication**

Lstrandstart=10969;

## **The fractions of A, C, G, T on the heavy and light strands of mtDNA**

fdTH=0.309;

fdTL=0.247;

fdCH=0.131;

fdCL=0.313;

fdAH=0.247;

fdAL=0.309;

fdGH=0.313;

fdGL=0.131;

## **Hill coefficient of TK2-thymidine reaction**

Reference [8]

tk2hill=0.5;

## **The length of both strands of mtDNA**

DNAlength=33136;

## **The length of one strand of mtDNA**

strandDNA=DNAlength / 2;

## **Volume of a mitochondrion**

Reference [25]

volmito=2 x 10<sup>-16</sup>;

## **Conversion factor used to convert Kms and concentrations from micromolar to molecules per mitochondrion**

(conversion = 120.4;)

conversion=1 x 10<sup>-6</sup> x 6.022 x 10<sup>23</sup> x volmito;

secondsperminute=60;

## **Factor used to decrease the Vmax of the polymerase on double stranded templates with lower primer density**

Reference [25]

dsfact=1 / 2;

## **Polymerase kinetic constants**

Reference [14]

$V_{\max}^{\text{PoldT}} = 25.0 \times \text{dsfact} \times \text{secondsperminute};$

$V_{\max}^{\text{PoldC}} = 43.0 \times \text{dsfact} \times \text{secondsperminute};$

$V_{\max}^{\text{PoldA}} = 45.0 \times \text{dsfact} \times \text{secondsperminute};$

$V_{\max}^{\text{PoldG}} = 37.0 \times \text{dsfact} \times \text{secondsperminute};$

$K_{\text{m}}^{\text{PoldT}} = 0.63 \times \text{conversion};$

$K_{\text{m}}^{\text{PoldC}} = 0.9 \times \text{conversion};$

$K_{\text{m}}^{\text{PoldA}} = 0.8 \times \text{conversion};$

$K_{\text{m}}^{\text{PoldG}} = 0.8 \times \text{conversion};$

### **Ki of dTTP on TK2**

Reference [21]

$k_{\text{dttptk2}} = 2.3 \times \text{conversion};$

### **Ki of dUTP on TK2: geometric mean of dCTP and dTTP values**

$k_{\text{dutptk2}} = 1.38 \times \text{conversion};$

### **Ki of dCTP on TK2**

Reference [21]

$k_{\text{dctptk2}} = 0.83 \times \text{conversion};$

### **Ki of dU on TK2: geometric mean**

Reference [8]

$k_{\text{dutk2}} = 227 \times \text{conversion};$

### **Ki of dC on TK2**

Reference [21]

$k_{\text{dctk2}} = 40 \times \text{conversion};$

### **Ki of dT on TK2**

Reference [21]

$k_{\text{dttk2}} = 4.9 \times \text{conversion};$

**(Substrate Kis on DGUOK set equal to substrate Kms)**

### **Ki of dI on DGUOK set equal to Km**

Reference [20]

$k_{\text{didgk}} = 12 \times \text{conversion};$

### **Ki of dIMP on DGUOK**

Reference [36]

$k_{\text{dimpdgk}} = 78 \times \text{conversion};$

### **Ki of dITP on DGUOK set equal to dATP Ki**

$k_{\text{ditpdgk}} = k_{\text{datpdgk}};$

**Ki of dGMP on DGUOK**

Reference [36]

kidgmpdgk=4 x conversion;

**Ki of dAMP on DGUOK**

Reference [36]

kidampdgk=28 x conversion;

**Ki of dATP on DGUOK**

Reference [36]

kidatpdgk=41 x conversion;

**Ki of dGTP on DGUOK**

Reference [36]

kidgtpdgk=0.4 x conversion;

**Estimated nucleoside transporter (ENT) molecular weight in kilodalton**

Reference [25]

transporterMW=50;

**TK2 and DGUOK molecular weights in kilodalton**

(DGUOK is a dimer, TK2 exists both as dimer and tetramer (mean taken))

Reference [37,38]

dgkMW=58;

tk2MW=87;

**Molecular weight of NT5M in kilodalton (dimer)**

Reference [19,24]

dnt2MW=46;

**Ectonucleotidase molecular weight in kilodalton (tetramer)**

Reference [23]

enMW=210;

**TMPK2 molecular weight in kilodalton**

Reference [39]

tmpk2MW=44;

**GMPK2 assumed molecular weight in kilodalton**

Reference [23]

gmpk2MW=22;

**CMPK2 molecular weight in kilodalton**

Reference [22]

cmpk2MW=44.5;

**AK2 molecular weight in kilodalton**

Reference [UniProt accession P54819]

akMW=26;

**NME4 molecular weight in kilodalton (homohexamer)**

Reference [17]

ndpkMW=120;

**Nucleoside kinase molecules in each mitochondrion**

Reference [25]

tk2moleculespermito=100;

dgkmoleculespermito=200;

**NT5M molecules in each mitochondrion**

Reference [25]

dnt2moleculespermito=50;

**Ectonucleotidase molecules in each mitochondrion**

enmoleculespermito=50;

**TMPK2 molecules in each mitochondrion**

Reference[25]

tmpk2moleculespermito=50;

**GMPK2 molecules in each mitochondrion**

Reference [25]

gmpk2moleculespermito=50;

**CMPK2 molecules in each mitochondrion**

Reference [25]

cmpk2moleculespermito=50;

**NME4 molecules in each mitochondrion**

Reference [25]

ndpkmoleculespermito=300;

**The factor that the reverse reaction is faster than the forward reaction for NMPK**

factorMD=0.1; (AMP/ADP)

**The factor that the reverse reaction is faster than the forward reaction for NDPK**

factorDT=0.1; (ADP/ATP)

**ENT molecules per mitochondrion**

Reference [25]

transportermoleculespermito=38;

**Adenylate kinase molecules per mitochondrion**

Reference [25]

$ak_{\text{moleculespermito}}=450;$

**ENT Vmax converting from micromoles substrate/mg enzyme/minute to molecules substrate/mitochondrion/minute**

Reference [40,41]

$transporterv_{\text{max}}=0.000086/0.0000021 \times transporter_{\text{moleculespermito}};$

**Vmax of the first phosphorylation of dT in the forward direction converting from micromoles substrate/mg enzyme/minute to molecules substrate/mitochondrion/minute**

Reference [21]

$V_{\text{max1PfdT}}=1.288 \times tk2_{\text{MW}} \times tk2_{\text{moleculespermito}};$

**Vmax of the first phosphorylation of dC in the forward direction converting from micromoles substrate/mg enzyme/minute to molecules substrate/mitochondrion/minute**

Reference [21]

$V_{\text{max1PfdC}}=0.789 \times tk2_{\text{MW}} \times tk2_{\text{moleculespermito}};$

**Vmax of dC with DGUOK converting from micromoles substrate/mg enzyme/minute to molecules substrate/mitochondrion/minute**

Reference [20]

$V_{\text{max1PfdCdgk}}=0.059 \times dgk_{\text{MW}} \times dgk_{\text{moleculespermito}};$

**Vmax of the first phosphorylation of dA in the forward direction converting from micromoles substrate/mg enzyme/minute to molecules substrate/mitochondrion/minute**

Reference [20]

$V_{\text{max1PfdA}}=0.429 \times dgk_{\text{MW}} \times dgk_{\text{moleculespermito}};$

**Vmax of the first phosphorylation of dG in the forward direction converting from micromoles substrate/mg enzyme/minute to molecules substrate/mitochondrion/minute**

Reference [20]

$V_{\text{max1PfdG}}=0.043 \times dgk_{\text{MW}} \times dgk_{\text{moleculespermito}};$

**Vmax of the first phosphorylation of dT in the reverse direction converting from micromoles substrate/mg enzyme/minute to molecules substrate/mitochondrion/minute**

Reference [16]

$V_{\text{max1PrdT}}=74 \times dnt2_{\text{MW}} \times dnt2_{\text{moleculespermito}};$

**Ectonucleotidase Vmax of the first phosphorylation of dT in the reverse direction converting from micromoles substrate/mg enzyme/minute to molecules substrate/mitochondrion/minute**

$V_{\text{max1PrdT}_{\text{en}}}=4.5 \times en_{\text{MW}} \times en_{\text{moleculespermito}};$

**Vmax of the first phosphorylation of dC in the reverse direction converting from micromoles substrate/mg enzyme/minute to molecules substrate/mitochondrion/minute**

$V_{\max 1PrdC} = 4.5 \times enMW \times enmoleculespermito;$

**V<sub>max</sub> of the first phosphorylation of dA in the reverse direction converting from micromoles substrate/mg enzyme/minute to molecules substrate/mitochondrion/minute**  
 $V_{\max 1PrdA} = 4.5 \times enMW \times enmoleculespermito;$

**V<sub>max</sub> of the first phosphorylation of dG in the reverse direction converting from micromoles substrate/mg enzyme/minute to molecules substrate/mitochondrion/minute**  
 $V_{\max 1PrdG} = 4.5 \times enMW \times enmoleculespermito;$

**V<sub>max</sub> of the second phosphorylation of dT in the forward direction converting from micromoles substrate/mg enzyme/minute to molecules substrate/mitochondrion/minute**  
Reference [23]  
 $V_{\max 2PfdT} = 0.821 \times tmpk2MW \times tmpk2moleculespermito;$

**V<sub>max</sub> of the second phosphorylation of dC in the forward direction converting from micromoles substrate/mg enzyme/minute to molecules substrate/mitochondrion/minute**  
Reference [22]  
 $V_{\max 2PfdC} = 1.77 \times cmpk2MW \times cmpk2moleculespermito;$

**V<sub>max</sub> of the second phosphorylation of dA in the forward direction converting from micromoles substrate/mg enzyme/minute to molecules substrate/mitochondrion/minute**  
Reference [12]  
 $V_{\max 2PfdA} = 272.8 \times akMW \times akmoleculespermito;$

**V<sub>max</sub> of the second phosphorylation of dG in the forward direction converting from micromoles substrate/mg enzyme/minute to molecules substrate/mitochondrion/minute**  
Reference [23]  
 $V_{\max 2PfdG} = 1.54 \times gmpk2MW \times gmpk2moleculespermito;$

**V<sub>max</sub> of the second phosphorylation of dT in the reverse direction**  
 $V_{\max 2PrdT} = V_{\max 2PfdT} \times factorMD;$

**V<sub>max</sub> of the second phosphorylation of dC in the reverse direction**  
 $V_{\max 2PrdC} = V_{\max 2PfdC} \times factorMD;$

**V<sub>max</sub> of the second phosphorylation of dA in the reverse direction**  
 $V_{\max 2PrdA} = V_{\max 2PfdA} \times factorMD;$

**V<sub>max</sub> of the second phosphorylation of dG in the reverse direction**  
 $V_{\max 2PrdG} = V_{\max 2PfdG} \times factorMD;$

**V<sub>max</sub> of the third phosphorylation of dT in the forward direction converting from micromoles substrate/mg enzyme/minute to molecules substrate/mitochondrion/minute**  
Reference [42]  
 $V_{\max 3PfdT} = 140 \times ndpkMW \times ndpkmoleculespermito;$

**V<sub>max</sub> of the third phosphorylation of dC in the forward direction converting from micromoles substrate/mg enzyme/minute to molecules substrate/mitochondrion/minute**

Reference [42]

$V_{\max 3PfdC} = 50 \times \text{ndpkMW} \times \text{ndpkmoleculespermito};$

**V<sub>max</sub> of the third phosphorylation of dA in the forward direction converting from micromoles substrate/mg enzyme/minute to molecules substrate/mitochondrion/minute**

Reference [17]

$V_{\max 3PfdA} = 225 \times \text{ndpkMW} \times \text{ndpkmoleculespermito};$  (set equal to dGDP V<sub>max</sub>)

**V<sub>max</sub> of the third phosphorylation of dG in the forward direction converting from micromoles substrate/mg enzyme/minute to molecules substrate/mitochondrion/minute**

Reference [42]

$V_{\max 3PfdG} = 225 \times \text{ndpkMW} \times \text{ndpkmoleculespermito};$

**V<sub>max</sub> of the third phosphorylation of dT in the reverse direction**

$V_{\max 3PrdT} = V_{\max 3PfdT} \times \text{factorDT};$

**V<sub>max</sub> of the third phosphorylation of dC in the reverse direction**

$V_{\max 3PrdC} = V_{\max 3PfdC} \times \text{factorDT};$

**V<sub>max</sub> of the third phosphorylation of dA in the reverse direction**

$V_{\max 3PrdA} = V_{\max 3PfdA} \times \text{factorDT};$

**V<sub>max</sub> of the third phosphorylation of dG in the reverse direction**

$V_{\max 3PrdG} = V_{\max 3PfdG} \times \text{factorDT};$

**ENT K<sub>m</sub>**

Reference [40]

$\text{transporterkm} = 2 \times \text{conversion};$

**K<sub>m</sub> of the first phosphorylation of dT in the forward direction**

Reference [21]

$\text{km1PfdT} = 13 \times \text{conversion};$

**K<sub>m</sub> of the first phosphorylation of dC in the forward direction**

Reference [21]

$\text{km1PfdC} = 11 \times \text{conversion};$

**K<sub>m</sub> of dC with DGUOK**

Reference [20]

$\text{km1PfdCdgc} = 336 \times \text{conversion};$

**K<sub>m</sub> of the first phosphorylation of dA in the forward direction**

Reference [20]

km1PfdA=467 x conversion;

**Km of the first phosphorylation of dG in the forward direction**

Reference [20]

km1PfdG=4 x conversion;

**Km of the first phosphorylation of dT, dU in the reverse direction**

Reference [19]

km1PrdT=200 x conversion;

km1PrdU=100 x conversion;

km1PrU=1.5 x km1PrdT;

**Ectonucleotidase data: geometric means for substrate Kms, higher Kms plugged for inhibitions to be conservative**

Reference [23,24]

**Ectonucleotidase Km of the first phosphorylation of dT, dU, rU in the reverse direction**

km1PrdT=22.5 x conversion;

km1PrdU=110 x conversion; (set equal to UMP Km)

km1PrU=110 x conversion; (set equal to Km)

**Ectonucleotidase Km of the first phosphorylation of dC, rC in the reverse direction**

km1PrdC=290 x conversion;

km1PrC=360 x conversion;

**Ectonucleotidase Km of the first phosphorylation of dA, rA in the reverse direction**

km1PrdA=62 x conversion;

km1PrA=19 x conversion; (set equal to Km)

kiadpen=17 x conversion;

kiatpen=15 x conversion;

**Ectonucleotidase Km of the first phosphorylation of dG, rG in the reverse direction**

km1PrdG=48 x conversion;

km1PrG=59 x conversion; (set equal to Km)

**Ectonucleotidase Km of the first phosphorylation of dI, rI in the reverse direction**

km1PrdI=100 x conversion; (set equal to Km of IMP)

km1PrI=100 x conversion; (set equal to Km)

**Km of the second phosphorylation of dT in the forward direction**

Reference [12]

km2PfdT=20 x conversion;

km2PfdUtmpk2=2600 x conversion; (Km is 170, but Ki is 2600)

**Miscellaneous inhibitions**

Reference [23]



kidttptmpk2=700 x conversion;  
kidttmpk2=180 x conversion;

### **Km of the second phosphorylation of dC in the forward direction**

Reference [22]

km2PfdC=1310 x conversion;  
km2PfrC=3090 x conversion;  
km2PfrU=6300 x conversion;  
km2PfdUcmpk2=100 x conversion;

### **CMPK1 can phosphorylate AMP and dAMP**

Reference [43]

km2PfrAcmpk2=km2PrrAcmpk2=km2PfdAcmpk2=km2PrdAcmpk2=100 x 500 x conversion;  
(Km of CMP is 500 micromolar)

### **Km of the second phosphorylation of dA in the forward direction**

Reference [12]

km2PfdA=210 x conversion;  
km2PfrA=80 x conversion;

### **CMP and UMP have some reactivity with AK2 - included as inhibitions**

Reference [12]

km2PfrCak2=6000 x conversion;  
km2PfrUak2=9000 x conversion;

### **Km of the second phosphorylation of dG in the forward direction**

Reference [23]

km2PfdG=112 x conversion;  
km2PfrG=18 x conversion;

### **Km of the second phosphorylation of dT in the reverse direction**

km2PrdT=km2PfdT;  
km2PrdUtmpk2=km2PfdUtmpk2;

### **Km of the second phosphorylation of dC in the reverse direction**

km2PrdC=km2PfdC;  
km2PrrC=km2PfrC;  
km2PrrU=km2PfrU;  
km2PrdUcmpk2=km2PfdUcmpk2;

### **Km of the second phosphorylation of dA in the reverse direction**

km2PrdA=km2PfdA;  
km2PrrA=km2PfrA;

km2PrrCak2=km2PfrCak2;  
km2PrrUak2=km2PfrUak2;

**Km of the second phosphorylation of dG in the reverse direction**

$km2PrdG=km2PfdG;$

$km2PrrG=km2PfrG;$

**(Reaction is linear for dTDP and UDP until at least 1000 uM)**

**Km of the third phosphorylation of dT in the forward direction**

Reference [42]

$km3PfdT=1000 \times \text{conversion};$

$km3PfdU=km3PfdT;$

$km3PfrU=km3PfdT;$

**Km of the third phosphorylation of dC in the forward direction**

Reference [42]

$km3PfdC=1000 \times \text{conversion};$  (dNDPs are weaker substrates than rNDPs: author statement but data n/a so same value used)

$km3PfrC=1000 \times \text{conversion};$  (Reaction linear until at least 1000 uM)

**Km of the third phosphorylation of dA in the forward direction**

Reference [42]

$km3PfdA=70 \times \text{conversion};$  (Km of ADP is about 70 micromolar, Km of dADP set equal to that of dGDP)

$km3PfrA=300 \times \text{conversion};$  (substrate inhibition,  $K_i$ )

**Km of the third phosphorylation of dG in the forward direction**

Reference [42]

$km3PfdG=75 \times \text{conversion};$

$km3PfrG=100 \times \text{conversion};$  (substrate inhibition,  $K_i$ )

**Inosine inhibitions**

$km3PfrI=km3PrrI=km3PfdI=km3PrdI=1000 \times \text{conversion};$

**Km of the third phosphorylation of dT in the reverse direction**

$km3PrdT=km3PfdT;$

$km3PrdU=km3PrdT;$

$km3PrrU=km3PrdT;$

**Km of the third phosphorylation of dC in the reverse direction**

$km3PrdC=km3PfdC;$

$km3PrrC=km3PrdC;$

**Km of the third phosphorylation of dA in the reverse direction**

$km3PrdA=km3PfdA;$

$km3PrrA=km3PrdA;$

### **Km of the third phosphorylation of dG in the reverse direction**

km3PrdG=km3PfdG;

km3PrrG=km3PrdG;

### **(Initial concentrations selected randomly)**

#### **Initial dN concentrations**

dTcyto=RandomReal[{0.05 x conversion, 5 x conversion}];

dCcyto=RandomReal[{0.05 x conversion, 5 x conversion}];

dAcyto=RandomReal[{0.05 x conversion, 5 x conversion}];

dGcyto=RandomReal[{0.05 x conversion, 5 x conversion}];

dT0=dTcyto;

dC0=dCcyto;

dA0=dAcyto;

dG0=dGcyto;

#### **Initial dNXP and rNXP levels**

If[celltype==1,dTTPcyto=RandomReal[{0.1 x conversion, 10 x conversion}]];

If[celltype==1,dCTPcyto=RandomReal[{0.1 x conversion, 10 x conversion}]];

If[celltype==1,dATPcyto=RandomReal[{0.1 x conversion, 10 x conversion}]];

If[celltype==1,dGTPcyto=RandomReal[{0.1 x conversion, 10 x conversion}]];

dTMP0=RandomReal[{0.01 x conversion, 10 x conversion}];

dTDP0=RandomReal[{0.01 x conversion, 10 x conversion}];

dTTP0=dTTPcyto;

dCMP0=RandomReal[{0.01 x conversion, 10 x conversion}];

dCDP0=RandomReal[{0.01 x conversion, 10 x conversion}];

dCTP0=dCTPcyto;

dAMP0=RandomReal[{0.01 x conversion, 10 x conversion}];

dADP0=RandomReal[{0.01 x conversion, 10 x conversion}];

dATP0=dATPcyto;

dGMP0=RandomReal[{0.01 x conversion, 10 x conversion}];

dGDP0=RandomReal[{0.01 x conversion, 10 x conversion}];

dGTP0=dGTPcyto;

dU=dUcyto=dTcyto;

rU=rUcyto=dTcyto;

dI=dIcyto=0.1 x dAcyto;

rI=rIcyto=0.1 x dAcyto;

rC=rCcyto=dCcyto;

rA=rAcyto=dAcyto;

rG=rGcyto=dGcyto;

dUMP=1 x conversion; (0.1 x dTMP0;)  
rUMP=10 x conversion; (10 x dTMP0;)  
dIMP=1 x conversion; (0.1 x dAMP0;)  
rIMP=1 x conversion; (0.1 x dAMP0;)  
rCMP=10 x conversion; (10 x dCMP0;)  
rAMP=10 x conversion; (10 x dAMP0;)  
rGMP=10 x conversion; (10 x dGMP0;)

dUDP=1 x conversion; (0.1 x dTDP0;)  
rUDP=10 x conversion; (10 x dTDP0;)  
dIDP=1 x conversion; (0.1 x dADP0;)  
rIDP=1 x conversion; (0.1 x dADP0;)  
rCDP=10 x conversion; (10 x dCDP0;)  
rADP=10 x conversion; (10 x dADP0;)  
rGDP=10 x conversion; (10 x dGDP0;)

dUTP=1 x conversion; (0.1 x dTTP0;)  
rUTP=10 x conversion; (10 x dTTP0;)  
dITP=1 x conversion; (0.1 x dATP0;)  
rITP=1 x conversion; (0.1 x dATP0;)  
rCTP=10 x conversion; (10 x dCTP0;)  
rATP=10 x conversion; (10 x dATP0;)  
rGTP=10 x conversion; (10 x dGTP0;)

DNA0=0;  
LDNA0=0;  
HDNA0=0;
